# Resuscitative Endovascular Balloon Occlusion of the Aorta (REBOA) for Hemorrhagic Shock

*LtCol Jeremy Cannon, USAF, MC; MAJ Jonathan Morrison, MC, UK; MAJ Cynthia Lauer, MC, USA; LCDR Daniel Grabo, MD, USN; CDR Travis Polk, MC, USN; COL Lorne Blackburne, MC, USA; LtCol Joseph Dubose, USAF, MC; Col Todd Rasmussen, USAF, MC*

**ABSTRACT** This clinical practice guideline (CPG) reviews the range of accepted management approaches to profound shock and post-traumatic cardiac arrest and establishes indications for considering Resuscitative Endovascular Balloon Occlusion of the Aorta (REBOA) as a hemorrhage control adjunct. The specific management approach – within the parameters of mission, resources, and tactical situation – will depend on the casualty's physical location, mechanism and pattern of injury, and the experience level of the surgeon. The optimal management strategy is best determined by the surgeon at the bedside.

## BACKGROUND

- Hemorrhage is the leading cause of preventable death on the battlefield.<sup>1–3</sup> Hemorrhage can be broadly categorized as compressible or non-compressible depending on its location. Non-compressible torso hemorrhage (NCTH) arises from trauma to the torso vessels, pulmonary parenchyma, solid abdominal organs or disruption of the bony pelvis.<sup>4</sup> Because NCTH is both occult and not amenable to control by direct pressure, it is particularly lethal.<sup>5</sup>
- NCTH resulting in hypotension or shock does not improve with external cardiac compression.<sup>6</sup> Rather, in many cases, resuscitative aortic occlusion (RAO) is required prior to definitive exploration. This maneuver affords proximal hemorrhage control while increasing afterload and central aortic pressure until direct hemostasis can be achieved. RAO has traditionally required a left thoracotomy or a laparotomy for aortic exposure.<sup>7–10</sup> The resuscitative thoracotomy has a high mortality rate, significant potential for casualty and trauma team morbidity, and high resource utilization, due largely to the nature of the injuries leading to arrest.<sup>11–13</sup> Nonetheless, data from theater indicate that there is a reasonable probability of long-term survival and recovery following RAO in appropriately selected casualties<sup>14</sup> as described in the Emergent Resuscitative Thoracotomy CPG.<sup>15</sup>
- REBOA is an alternative approach to RAO in patients at risk of imminent cardiovascular collapse. This procedure is performed through a transfemoral arterial approach without the need for thoracotomy. Thus, this approach is particularly appealing when the focus of hemorrhage is

infra-diaphragmatic in origin and no additional thoracic intervention is indicated.

- This technique was first described as a resuscitative intervention by Hughes in 1954 in three moribund combat casualties.<sup>16</sup> Since this early publication, REBOA has been further explored as a resuscitation adjunct by others.<sup>17,18</sup>
- In recent years, renewed interest in endovascular occlusion prompted detailed analysis of REBOA in the animal laboratory.<sup>19,20</sup> These experiments demonstrated the potential merits of REBOA with occlusion times of up to 90 minutes.<sup>21</sup>
- Significant improvements in endovascular equipment and growing experience in endovascular techniques have spurred renewed clinical interest in REBOA. Specific applications now include proximal aortic occlusion in the management of ruptured abdominal aortic aneurysm,<sup>22</sup> elective oncologic resections,<sup>23</sup> pelvic hemorrhage from gynecologic pathology,<sup>24</sup> and traumatic NCTH.<sup>25–27</sup> Thus, REBOA appears ideally suited to serve as a temporary, minimally invasive bridge to definitive surgical or endovascular hemorrhage control.
- Given that (1) the skill and technology for application of this technique may be available in the deployed or austere setting and (2) balloon aortic occlusion provides a less invasive and expedient means to control life-threatening hemorrhage in appropriately selected casualties, this intervention is now recommended as an option to temporarily control life-threatening hemorrhage in the setting of truncal, junctional and extremity injury until definitive surgical hemostasis can be achieved.

Joint Trauma System, 3698 Chambers Pass, Joint Base San Antonio, Fort Sam Houston, TX 78234-6315.

doi: 10.1093/milmed/usy143

Published by Oxford University Press on behalf of the Association of Military Surgeons of the United States 2018. This work is written by (a) US Government employee(s) and is in the public domain in the US.

## RAO IN TRAUMATIC ARREST AND PROFOUND SHOCK

Given the lack of large-scale human studies demonstrating the effectiveness of REBOA over other RAO techniques, the precise indications of this technology remain unclear.

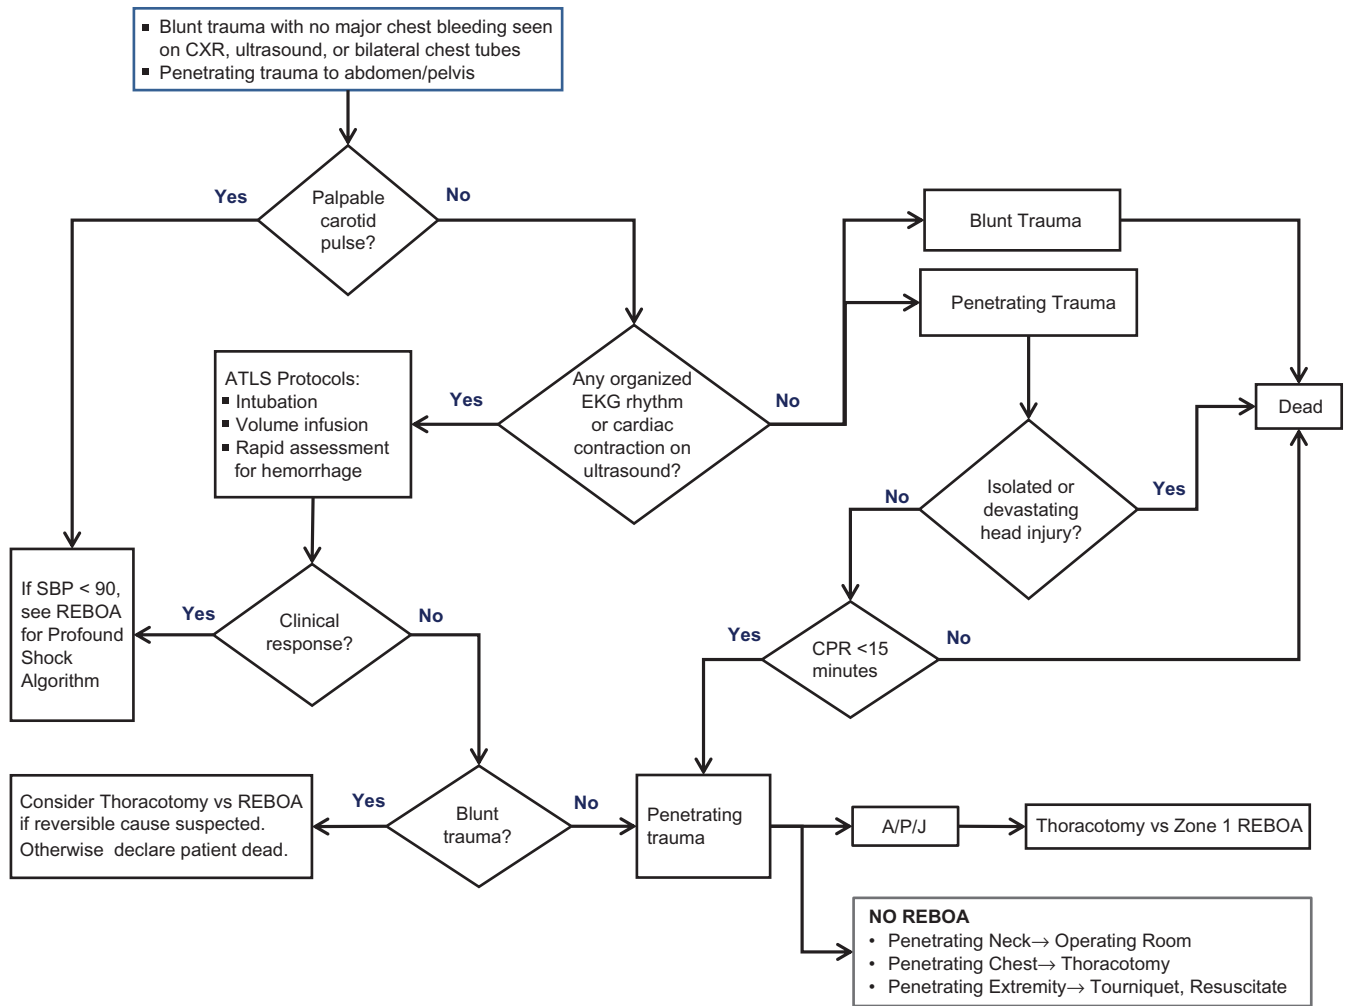

**FIGURE 1.** Recommended algorithm for ERT in traumatic arrest.

However, the suggested indications for REBOA are summarized below. These indications mirror the indications for resuscitative thoracotomy with the exception of shock or arrest secondary to penetrating chest trauma, which is preferentially treated with thoracotomy.<sup>27</sup>

### Initial Management

Cardiac arrest in combat injury is most often caused by exsanguination. Initial management priorities include early control of hemorrhage and hemostatic resuscitation as described in the Damage Control Resuscitation CPG. Closed chest cardiac massage has little benefit if the intravascular space is empty. Thus, the initial focus in patients who present without a pulse must be to determine the following:

- Mechanism and pattern of injury.
- Duration of CPR.
- Presence of a pulse.
- Presence of an organized, narrow complex cardiac rhythm and/or organized cardiac activity by ultrasound exam.

Based on these data, a decision either for or against RAO can be made using the algorithm is presented in Figure 1. If RAO is to be performed, closed chest cardiac massage can continue while the surgeons are preparing for this procedure. If RAO is not to be performed, resuscitative efforts should cease unless there is a compelling reason to consider a non-traumatic arrest.

Early identification of patients who are at risk for profound shock or traumatic arrest is also essential as early application of REBOA prior to impending arrest may lead to improved outcomes (Fig. 2). Casualties who lost vitals in the field and underwent CPR for some period of time followed by return of spontaneous circulation should be considered high risk for repeat traumatic arrest.

In addition, the following indicators of a need for massive transfusion can indicate others at high risk for profound shock or traumatic arrest:

- SBP < 90: T < 35.5
- HR > 120: INR > 1.5

SBP<90 with Transient or No Response to initial ATLS Resuscitation

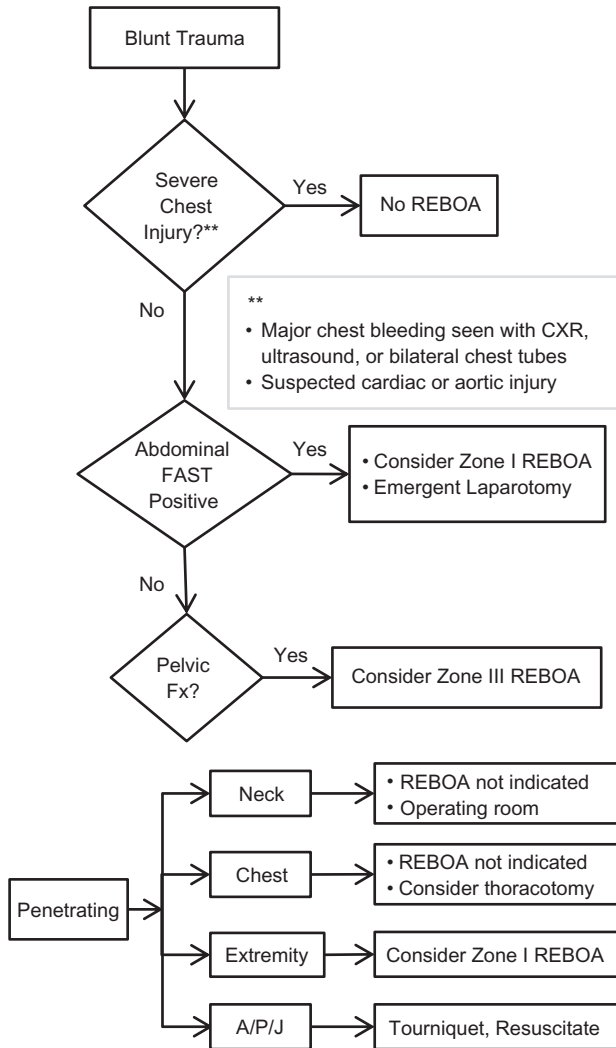

**FIGURE 2.** Algorithm for the use of REBOA for profound shock. REBOA: Resuscitative Endovascular Balloon Occlusion of the Aorta; ATLS: Advanced Trauma Life Support; ROSC: Return of Spontaneous Circulation; CXR: Chest X-Ray; EFAST: Extended Focused Assessment with Sonography for Trauma; FAST: Focused Assessment with Sonography for Trauma; A/P/J: Abdomen/Pelvis/Junctional Lower Extremity. Zone I REBOA: placement of aortic balloon in the thoracic aorta (insert catheter to 46 cm or measure the balloon to mid sternum/P-tip to sternal notch) Zone III REBOA: placement of aortic balloon directly above the aortic bifurcation (insert catheter to 27 cm or measure to the level of the umbilicus).

- Positive abdominal Focused Assessment with Sonography for Trauma (FAST): base deficit >6
- Penetrating mechanism: Hgb < 11

### Resuscitative Thoracotomy

Open aortic occlusion is best performed through a left anterolateral thoracotomy (See Emergent Resuscitative Thoracotomy CPG).

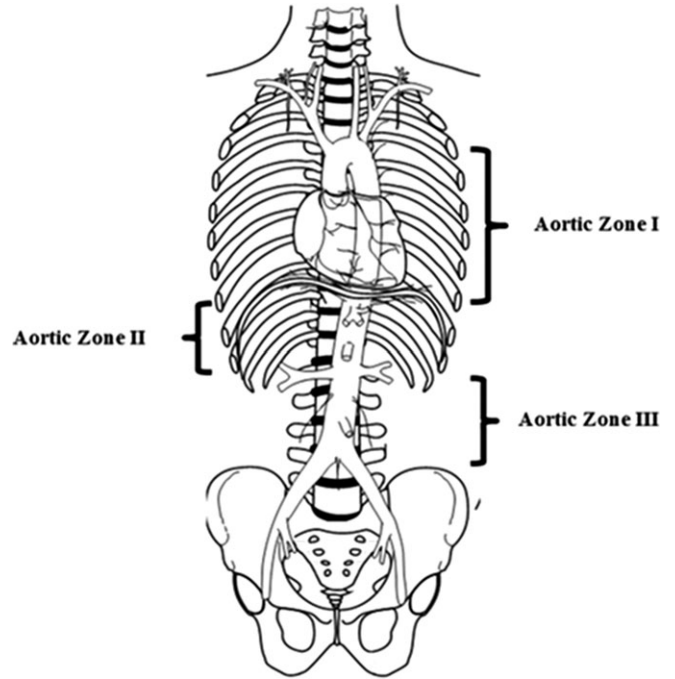

**FIGURE 3.** Aortic zones.

### Trans-abdominal Aortic Occlusion

The aorta can also be occluded trans-abdominally at any point along its length. It can be occluded with either application of a clamp or compression with a retractor or manually. In obese patients with a large volume of hemoperitoneum or other intra-abdominal pathology, a trans-thoracic approach to the aorta is sometimes preferable. As with all other forms of RAO, restoration of aortic perfusion should be carefully coordinated with the rest of the team to minimize the effects of re-perfusion and blood volume shifts.

### REBOA

As described above, REBOA is an alternative approach to resuscitative thoracotomy in some cases of traumatic arrest. Furthermore, REBOA can be performed pre-emptively in patients with high-risk injury patterns and unstable physiologic parameters as described above. In this way, REBOA can be proactive rather than reactive in the appropriately selected patient. The indications for REBOA are summarized in Figure 1 for traumatic arrest and Figure 2 in cases of profound shock. A schematic of the aortic anatomy is presented in Figure 3. If proximal aortic occlusion is required, this is termed REBOA I whereas distal aortic occlusion is termed REBOA III.

### RESOURCES AND TECHNIQUES

A detailed discussion of the technical approach to REBOA can be found in the landmark publication by Stannard, Eliason, and Rasmussen.<sup>28</sup>

In brief, REBOA can be considered in five sequential steps:

1. Arterial access and positioning of sheath
2. Selection and positioning of the balloon
3. Inflation of the balloon
4. Deflation of the balloon
5. Sheath removal

The essential equipment for REBOA, appropriate technical steps, and considerations can be found in the full CPG.

## FUTURE CONSIDERATIONS

A retrospective capability gap analysis of the UK Joint Theatre Trauma Registry suggests that as many as one in five severely injured casualties may have wounds that are amenable to treatment with REBOA.<sup>29</sup> Limitations to widespread use of this approach in an austere environment currently include the need for a large 12 Fr sheath, the relatively cumbersome over-the-wire insertion technique, and limited surgeon expertise. However, in the near future, a low profile occlusion balloon with an integrated wire is expected to enter production.<sup>19</sup> Furthermore, external landmarks are undergoing validation for REBOA insertion<sup>30,31</sup> and surgeon training in REBOA is ongoing at multiple centers.<sup>32–35</sup> All of these advances should facilitate appropriate clinical evaluation of REBOA to determine the optimal use of this resuscitation adjunct in the military setting.

## REFERENCES

1. Eastridge BJ, Hardin M, Cantrell J, et al: Died of wounds on the battlefield: causation and implications for improving combat casualty care. *J Trauma* 2011; 71(1 Suppl): S4–8.
2. Eastridge BJ, Mabry RL, Seguin P, et al: Death on the battlefield (2001–2011): implications for the future of combat casualty care. *J Trauma Acute Care Surg* 2012; 73(6 Suppl 5): S431–7.
3. Kisat M, Morrison JJ, Hashmi ZG, Efron DT, Rasmussen TE, Haider AH: Epidemiology and outcomes of non-compressible torso hemorrhage. *J Surg Res* 2013; 184(1): 414–21.
4. Morrison JJ, Rasmussen TE: Noncompressible torso hemorrhage: a review with contemporary definitions and management strategies. *Surg Clin North Am* 2012; 92(4): 843–58. vii.
5. Stannard A, Morrison JJ, Scott DJ, Ivatury RA, Ross JD, Rasmussen TE: The epidemiology of noncompressible torso hemorrhage in the wars in Iraq and Afghanistan. *J Trauma Acute Care Surg* 2013; 74(3): 830–4.
6. Mattox KL, Feliciano DV: Role of external cardiac compression in truncal trauma. *J Trauma* 1982; 22(11): 934–6.
7. Mattox KL, Wall MJ, Tsai P: Trauma thoracotomy: principles and techniques. In: *Trauma*, pp 461–7. Edited by Mattox KL, Moore EE, Feliciano DV New York, McGraw Hill Medical, 2013.
8. Ledgerwood AM, Kazmers M, Lucas CE: The role of thoracic aortic occlusion for massive hemoperitoneum. *J Trauma* 1976; 16(08): 610–5.
9. Burlew CC, Moore EE, Moore FA, et al: Western Trauma Association critical decisions in trauma: resuscitative thoracotomy. *J Trauma Acute Care Surg* 2012; 73(6): 1359–63.
10. Working Group Ad Hoc Subcommittee on Outcomes, American College of Surgeons-Committee on Trauma: Practice Management Guidelines for Emergency Department Thoracotomy. *J Am Coll Surg* 2001; 193(3): 303–9.
11. Seamon MJ, Fisher CA, Gaughan JP, Kulp H, Dempsey DT, Goldberg AJ: Emergency department thoracotomy: survival of the least expected. *World J Surg* 2008; 32(4): 604–12.
12. Brannney SW, Moore EE, Feldhaus KM, Wolfe RE: Critical analysis of two decades of experience with postinjury emergency department thoracotomy in a regional trauma center. *J Trauma* 1998; 45(1): 85–7.
13. Passos EM, Engels PT, Doyle JD, et al: Societal costs of inappropriate emergency department thoracotomy. *J Am Coll Surg* 2012; 214(1): 18–25.
14. Edens JW, Beekley AC, Chung KK, et al: Longterm outcomes after combat casualty emergency department thoracotomy. *J Am Coll Surg* 2009; 209(2): 188–97.
15. JTS Emergent Resuscitative Thoracotomy CPG. 02 Jul 2017. Available at [http://jts.amedd.army.mil/assets/docs/cpgs/JTS\\_Clinical\\_Practice\\_Guidelines\\_\(CPGs\)/REBOA\\_for\\_Hemorrhagic\\_Shock\\_06\\_Jul\\_2017\\_ID38.pdf](http://jts.amedd.army.mil/assets/docs/cpgs/JTS_Clinical_Practice_Guidelines_(CPGs)/REBOA_for_Hemorrhagic_Shock_06_Jul_2017_ID38.pdf). Accessed Jul 2018.
16. Hughes CW: Use of an intra-aortic balloon catheter tamponade for controlling intra-abdominal hemorrhage in man. *Surgery* 1954; 36(1): 65–8.
17. Gupta BK, Khaneja SC, Flores L, Eastlick L, Longmore W, Shaftan GW: The role of intra-aortic balloon occlusion in penetrating abdominal trauma. *J Trauma* 1989; 29(6): 861–5.
18. Low RB, Longmore W, Rubinstein R, Flores L, Wolvek S: Preliminary report on the use of the Percutaneous occluding aortic balloon in human beings. *Ann Emerg Med* 1986; 15(12): 1466–9.
19. White JM, Cannon JW, Stannard A, Markov NP, Spencer JR, Rasmussen TE: Endovascular balloon occlusion of the aorta is superior to resuscitative thoracotomy with aortic clamping in a porcine model of hemorrhagic shock. *Surgery* 2011; 150(3): 400–9.
20. Scott DJ, Eliason JL, Villamaria C, et al: A novel fluoroscopy-free, resuscitative endovascular aortic balloon occlusion system in a model of hemorrhagic shock. *J Trauma Acute Care Surg* 2013; 75(1): 122–8.
21. Markov NP, Percival TJ, Morrison JJ, et al: Physiologic tolerance of descending thoracic aortic balloon occlusion in a swine model of hemorrhagic shock. *Surgery* 2013; 153(6): 848–56.
22. Mayer D, Pfammatter T, Rancic Z, et al: 10 years of emergency endovascular aneurysm repair for ruptured abdominal aortoiliac aneurysms: lessons learned. *Ann Surg* 2009; 249(3): 510–5.
23. Tang X, Guo W, Yang R, Tang S, Dong S: Use of aortic balloon occlusion to decrease blood loss during sacral tumor resection. *J Bone Joint Surg Am* 2010; 92(8): 1747–53.
24. Bell-Thomas SM, Penketh RJ, Lord RH, Davies NJ, Collis R: Emergency use of a transfemoral aortic occlusion catheter to control massive haemorrhage at caesarean hysterectomy. *BJOG Int. J Obstet Gynaecol* 2003; 110(12): 1120–2.
25. Brenner ML, Moore LJ, Dubose JJ, et al: A clinical series of resuscitative endovascular balloon occlusion of the aorta for hemorrhage control and resuscitation. *J Trauma Acute Care Surg* 2013; 75(3): 506–11.
26. Martinelli T, Thony F, Declety P, et al: Intra-aortic balloon occlusion to salvage patients with life-threatening hemorrhagic shocks from pelvic fractures. *J Trauma* 2010; 68(4): 942–8.
27. Saito N, Matsumoto H, Yagi T, et al: Evaluation of the safety and feasibility of resuscitative endovascular balloon occlusion of the aorta. *J Trauma Acute Care Surg* 2015; 78(5): 897–903. discussion 904.
28. Biffi WL, Fox CJ, Moore EE: The role of REBOA in the control of exsanguinating torso hemorrhage. *J Trauma Acute Care Surg* 2015; 78(5): 1054–8.
29. Stannard A, Eliason JL, Rasmussen TE: Resuscitative endovascular balloon occlusion of the aorta (REBOA) as an adjunct for hemorrhagic shock. *J Trauma* 2011; 71(6): 1869–72.
30. Morrison JJ, Ross JD, Rasmussen TE, Midwinter MJ, Jansen JO: Resuscitative endovascular balloon occlusion of the aorta: a gap

- analysis of severely injured UK combat casualties. *Shock* August 2014; 41(5): 388–93.
31. Morrison JJ, Stannard A, Midwinter MJ, Sharon DJ, Eliason JL, Rasmussen TE: Prospective evaluation of the correlation between torso height and aortic anatomy in respect of a fluoroscopy free aortic balloon occlusion system. *Surgery* 2014; 155(6): 1044–51.
  32. Linnebur M, Inaba K, Haltmeir T, et al: Emergent non-image-guided REBOA catheter placement: a cadaver-based study. *J Trauma Acute Care Surg* 2016; 81(3): 453–7.
  33. Villamaria CY, Eliason JL, Napolitano LM, Stansfield RB, Spencer JR, Rasmussen TE: Endovascular Skills for Trauma and Resuscitative Surgery (ESTARS) course: curriculum development, content validation, and program assessment. *J Trauma Acute Care Surg* 2014; 76(4): 929–35. discussion 935–6.
  34. Brenner M, Hoehn M, Pasley J, Dubose J, Stein D, Scalea T: Basic endovascular skills for trauma course: bridging the gap between endovascular techniques and the acute care surgeon. *J Trauma Acute Care Surg* 2014; 77(2): 286–91.
  35. Brenner M, Hoehn M, Stein DM, Rasmussen TE, Scalea TM: Central pressurized cadaver model (CPCM) for resuscitative endovascular balloon occlusion of the aorta (REBOA) training and device testing. *J Trauma Acute Care Surg* 2015; 78(1): 197–200.
-
